# Supplementary material
Source: PubMed Central journal article supplement (PMC6071864)

## Crystallomycin revisited after 60 years: aspartocins B and C

Anton P. Tyurin, Vera A. Alferova, Alexander S. Paramonov, Maxim V. Shuvalov, Irina A. Malanicheva, Natalia E. Grammatikova, Pavel N. Solyev, Shaowei Liu, Chenghang Sun, Igor A. Prokhorenko, Tatyana A. Efimenko, Larisa P. Terekhova, Olga V. Efremenkova, Zakhar O. Shenkarev\* and Vladimir A. Korshun\*

### Supporting Information

#### Contents

|                                                                                                                                                                                                  |   |
|--------------------------------------------------------------------------------------------------------------------------------------------------------------------------------------------------|---|
| Fig. S1. Comparison of $^{13}\text{C}$ -HSQC spectra of aspartocin B and Cryst-2.....                                                                                                            | 2 |
| Fig. S2. The aliphatic fragment of 2D $^1\text{H}$ , $^1\text{H}$ -ROESY spectrum of Cryst-2.....                                                                                                | 3 |
| Fig. S3. The fragment of 2D $^1\text{H}$ , $^1\text{H}$ -NOESY spectrum that reveal the exchange processes between the four conformational sates ( <b>a,b,c,d</b> ) of Cryst-2 in solution. .... | 4 |
| Fig. S4. HRESI-MS spectrum of Cryst-1 ( <b>1</b> ).....                                                                                                                                          | 5 |
| Fig. S5. HRESI-MS spectrum of Cryst-2 ( <b>2</b> ).....                                                                                                                                          | 6 |
| Fig. S6. HPLC-MS analysis of the extract from producing strain <i>Streptomyces griseorubens</i> INA 00887 .....                                                                                  | 7 |

**Fig. S1.** Comparison of  $^{13}\text{C}$ -HSQC spectra of aspartocin B (black contours,  $\text{CD}_3\text{OD}$ ,  $27^\circ\text{C}$ , 400 MHz) and Cryst-2 (red contours,  $\text{CD}_3\text{OD}$ ,  $30^\circ\text{C}$ , 800 MHz).

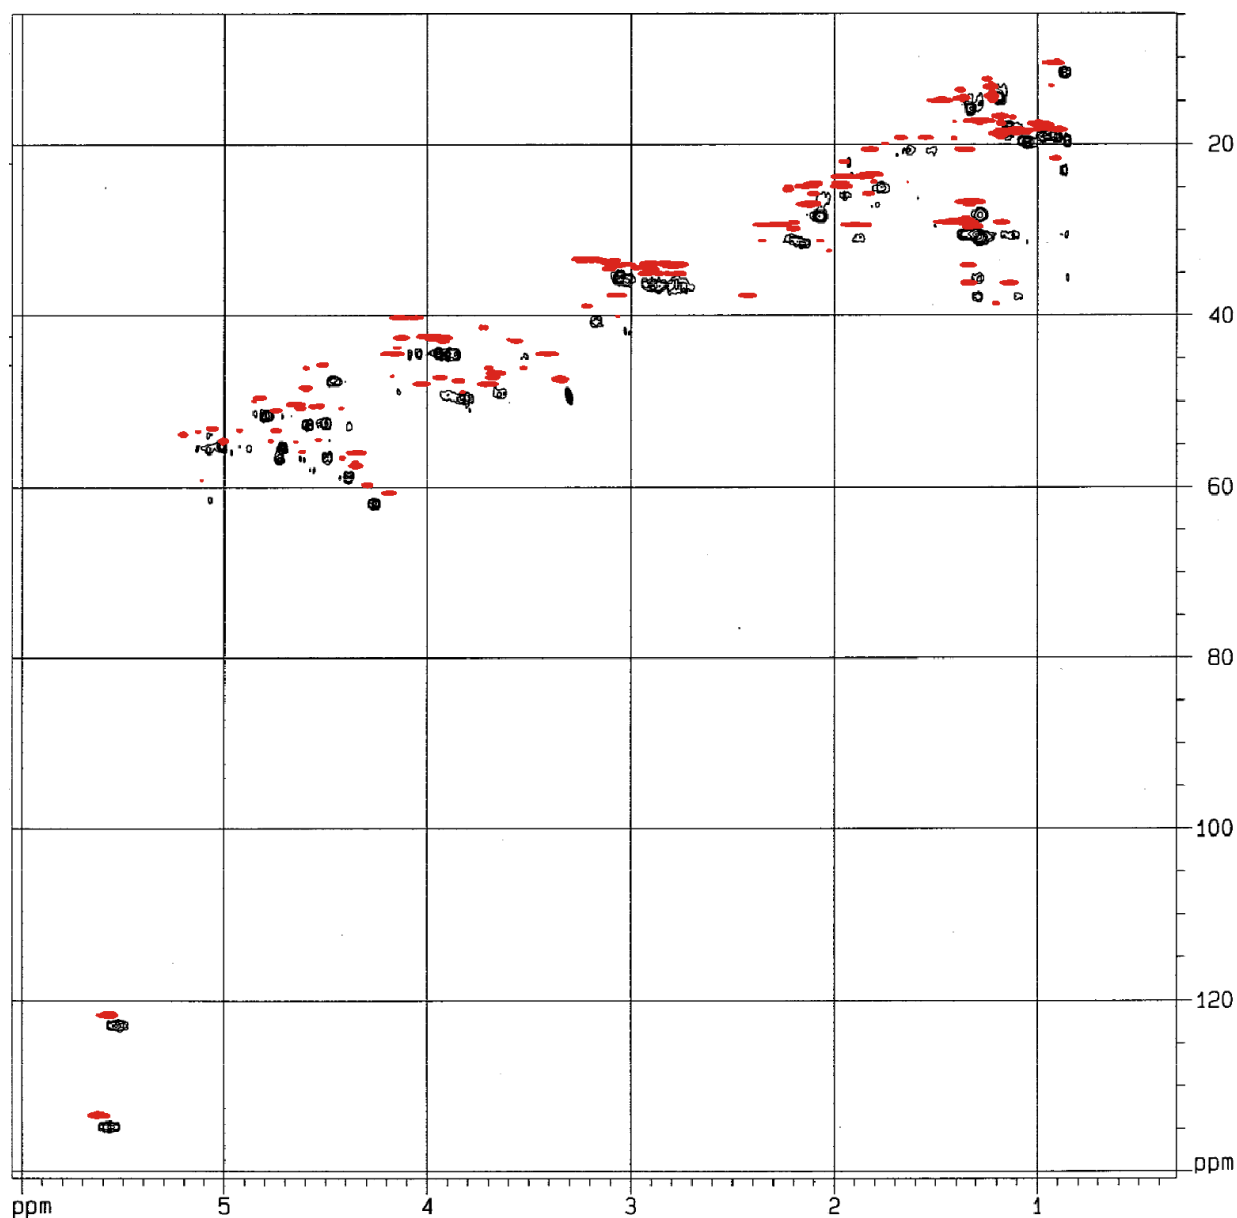

The spectrum of aspartocin B was taken from Supplementary Materials of (F. Kong, K. Janota, J.S. Ashcroft and G.T. Carter, *Rec. Nat. Prod.*, 2010, **4**, 131). The shift of the resonances in the  $^1\text{H}$  and  $^{13}\text{C}$  dimensions is probably originated by differences in experimental conditions (temperature, ionic strength, pH, NMR spectrometer frequency) and differences in the reference method used.

**Fig. S2.** The aliphatic fragment of 2D  $^1\text{H}$ ,  $^1\text{H}$ -ROESY spectrum of Cryst-2 ( $t_m = 200$  ms,  $\text{DMSO-}d_6$ ,  $30^\circ\text{C}$ , 800 MHz).

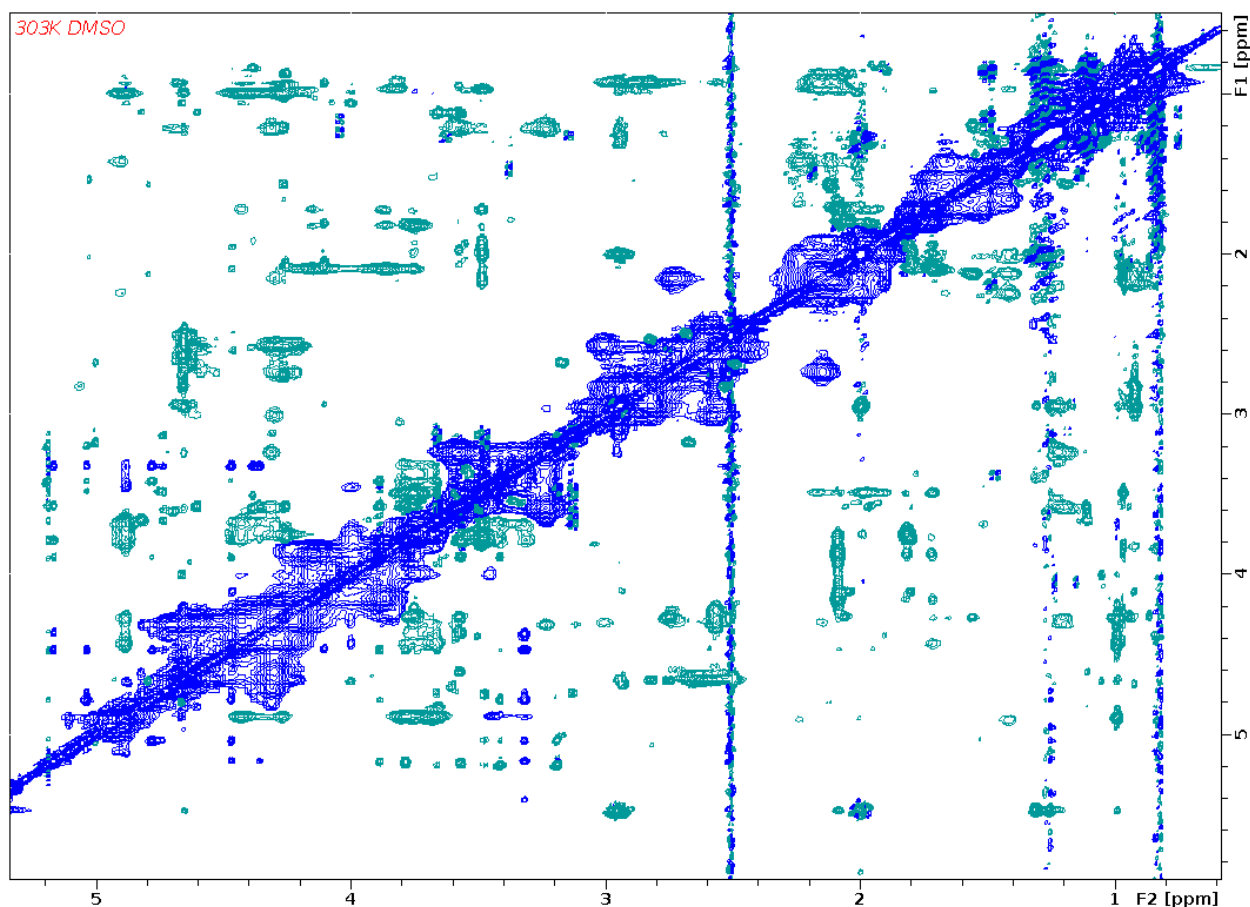

The blue contours (positive intensity) correspond to diagonal cross-peaks and peaks originated by conformational exchange processes. The green contours (negative intensity) correspond to NOE cross-peaks. The spectral regions near the diagonal are completely covered by exchange cross-peaks between four structural states of Cryst-2. Due to extreme crowding these peaks are run into the large blurs.

The chain of exchange cross-peaks at the water frequency (3.3 ppm) probably corresponds to OH-groups from carbohydrate impurity in the sample. These resonances are not connected with the spin-systems of Cryst-2 in NOESY, ROESY and TOCSY spectra. The Cryst-2 compound itself does not contain OH-groups.

**Fig. S3.** The fragment of 2D  $^1\text{H}$ ,  $^1\text{H}$ -NOESY spectrum (tm = 200 ms, DMSO- $d_6$ , 30°C, 800 MHz) that reveal the exchange processes between the four conformational states (a,b,c,d) of Cryst-2 in solution.

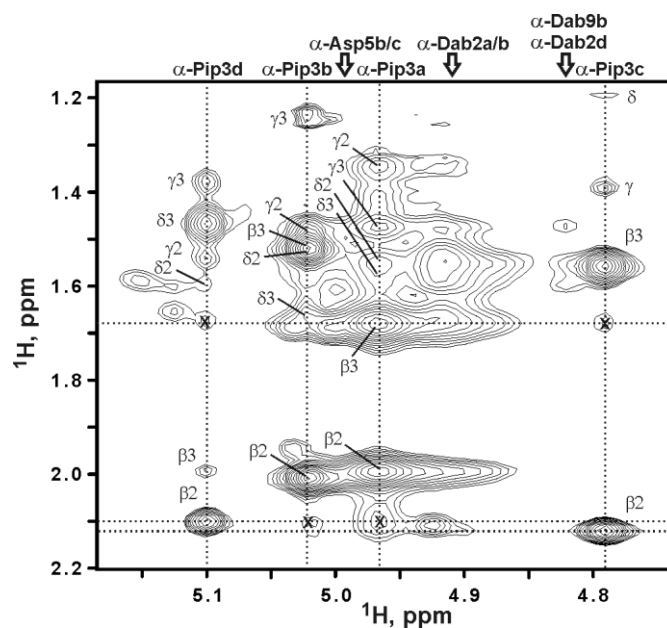

The assignment of intraresidual NOEs for the Pip3 residue in the four Cryst-2 conformers is shown. The exchange originated (inter-conformer) cross-peaks are marked by crosses. The corresponding exchange cross-peaks have negative intensity in the ROESY spectrum (Fig. S2) and, therefore, could not be easily differentiated from NOE cross-peaks.

**Fig. S4.** HRESI-MS spectrum of Cryst-1 (1)

**Analysis Info**

Analysis Name D:\Data\Ant-21 (Crys-1)\_17\_01\_1044.d  
Method la\_2.2.m  
Sample Name Ant-21 (Crys-1)  
Comment

Acquisition Date 5/24/2017 6:38:52 PM

Operator BDAL@DE  
Instrument compact 8255754.20088

**Acquisition Parameter**

|             |          |                      |          |                  |           |
|-------------|----------|----------------------|----------|------------------|-----------|
| Source Type | ESI      | Ion Polarity         | Positive | Set Nebulizer    | 0.4 Bar   |
| Focus       | Active   | Set Capillary        | 4500 V   | Set Dry Heater   | 180 °C    |
| Scan Begin  | 50 m/z   | Set End Plate Offset | -500 V   | Set Dry Gas      | 6.0 l/min |
| Scan End    | 3000 m/z | Set Charging Voltage | 2000 V   | Set Divert Valve | Source    |
|             |          | Set Corona           | 0 nA     | Set APCI Heater  | 0 °C      |

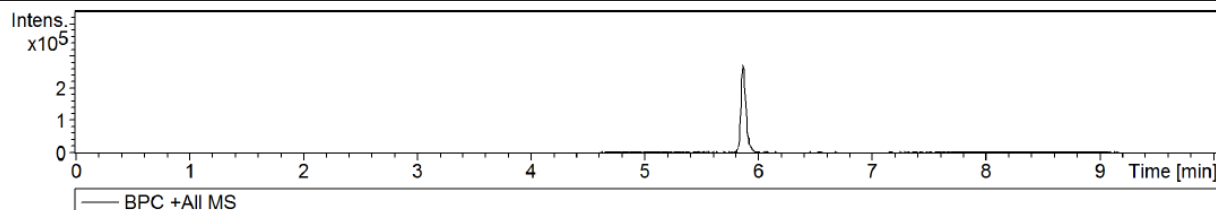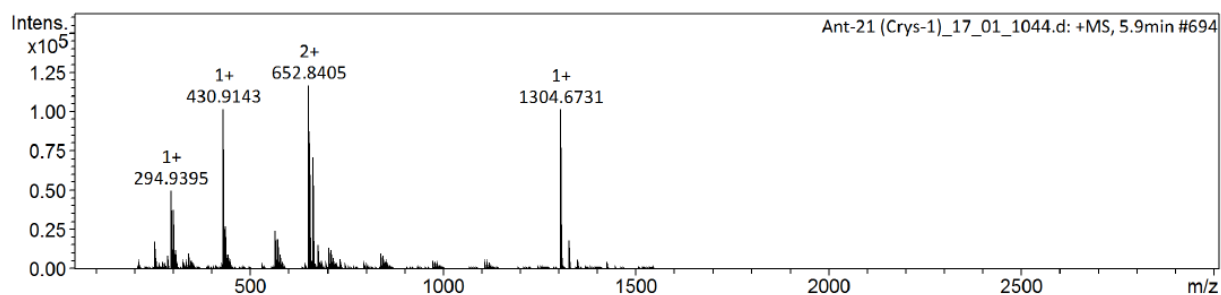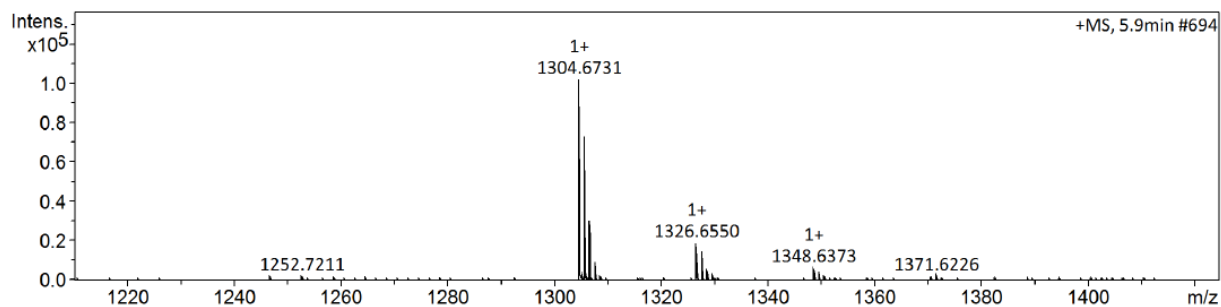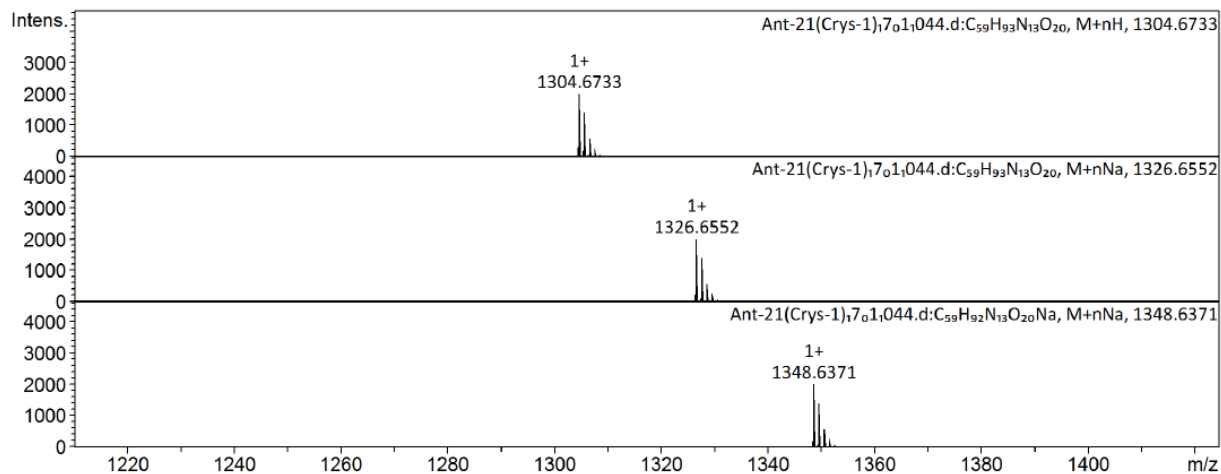

**Fig. S5.** HRESI-MS spectrum of Cryst-2 (2)

**Analysis Info**

Analysis Name D:\Data\Ant-22 (Crys-2)\_18\_01\_1045.d  
 Method la\_2.2.m  
 Sample Name Ant-22 (Crys-2)  
 Comment

Acquisition Date 5/24/2017 6:50:24 PM

Operator BDAL@DE  
 Instrument compact 8255754.20088

**Acquisition Parameter**

|             |          |                      |          |                  |           |
|-------------|----------|----------------------|----------|------------------|-----------|
| Source Type | ESI      | Ion Polarity         | Positive | Set Nebulizer    | 0.4 Bar   |
| Focus       | Active   | Set Capillary        | 4500 V   | Set Dry Heater   | 180 °C    |
| Scan Begin  | 50 m/z   | Set End Plate Offset | -500 V   | Set Dry Gas      | 6.0 l/min |
| Scan End    | 3000 m/z | Set Charging Voltage | 2000 V   | Set Divert Valve | Source    |
|             |          | Set Corona           | 0 nA     | Set APCI Heater  | 0 °C      |

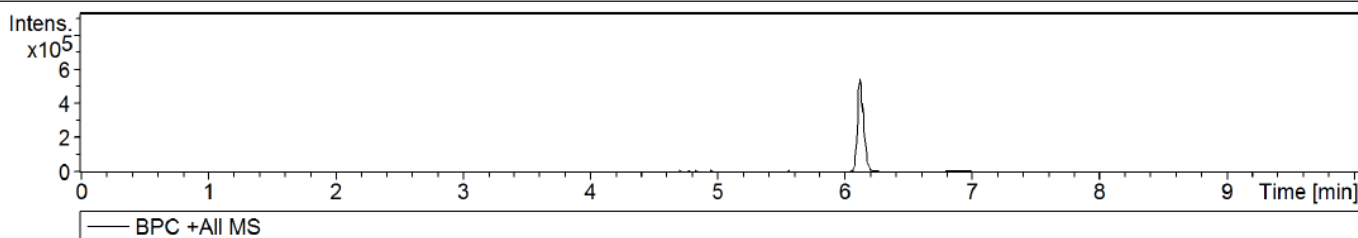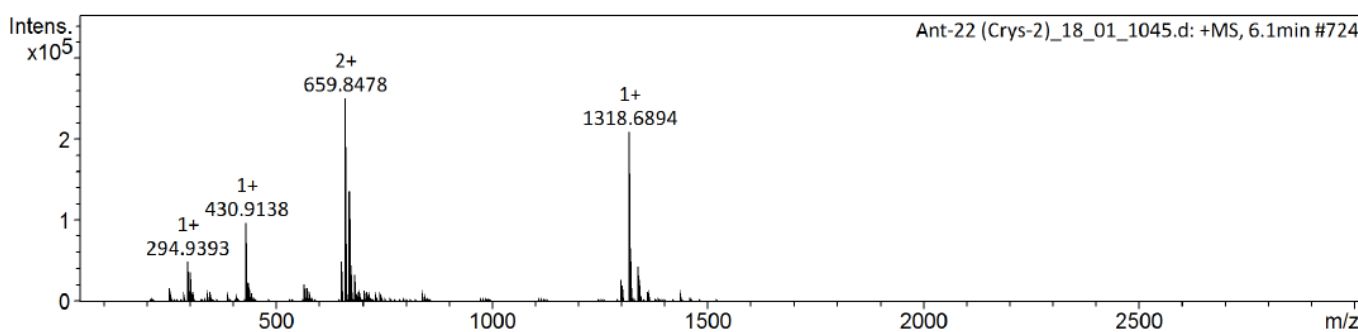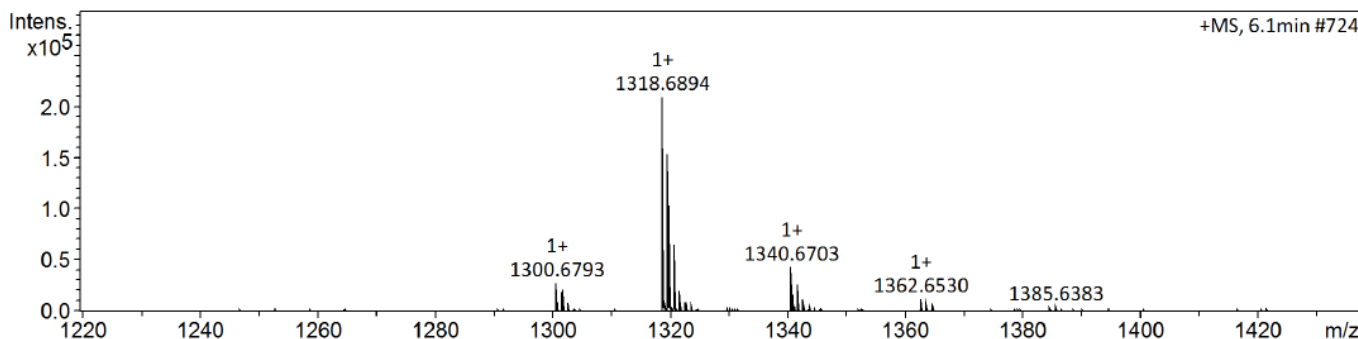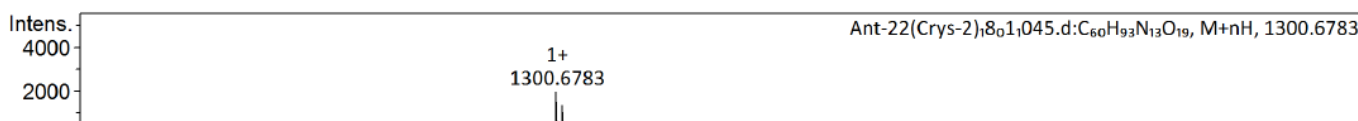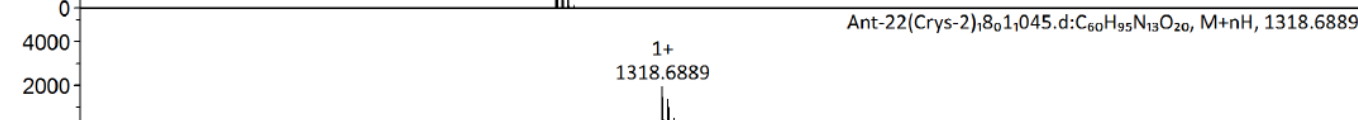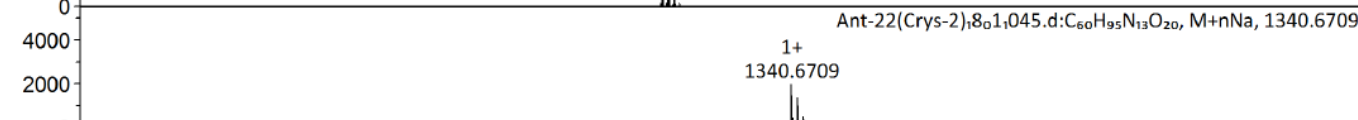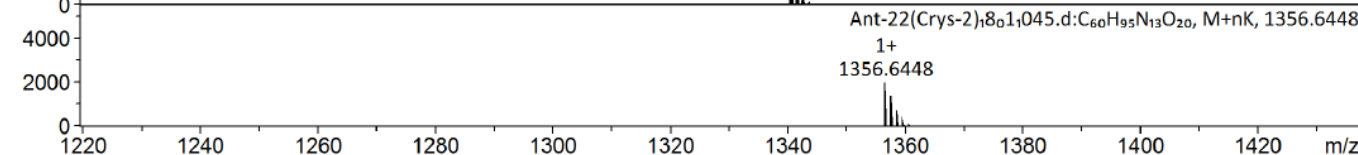

**Fig. S6.** HPLC-MS analysis of the extract from producing strain *Streptomyces griseorubens* INA 00887

**Analysis Info**

Analysis Name D:\Data\Ant-44\_12\_01\_1627.d  
 Method la\_2.2.m  
 Sample Name Ant-44  
 Comment

Acquisition Date 1/23/2018 1:08:23 PM

Operator BDAL@DE  
 Instrument compact 8255754.20088

**Acquisition Parameter**

|             |          |                      |          |                  |           |
|-------------|----------|----------------------|----------|------------------|-----------|
| Source Type | ESI      | Ion Polarity         | Positive | Set Nebulizer    | 0.4 Bar   |
| Focus       | Active   | Set Capillary        | 4500 V   | Set Dry Heater   | 180 °C    |
| Scan Begin  | 50 m/z   | Set End Plate Offset | -500 V   | Set Dry Gas      | 6.0 l/min |
| Scan End    | 3000 m/z | Set Charging Voltage | 2000 V   | Set Divert Valve | Source    |
|             |          | Set Corona           | 0 nA     | Set APCI Heater  | 0 °C      |

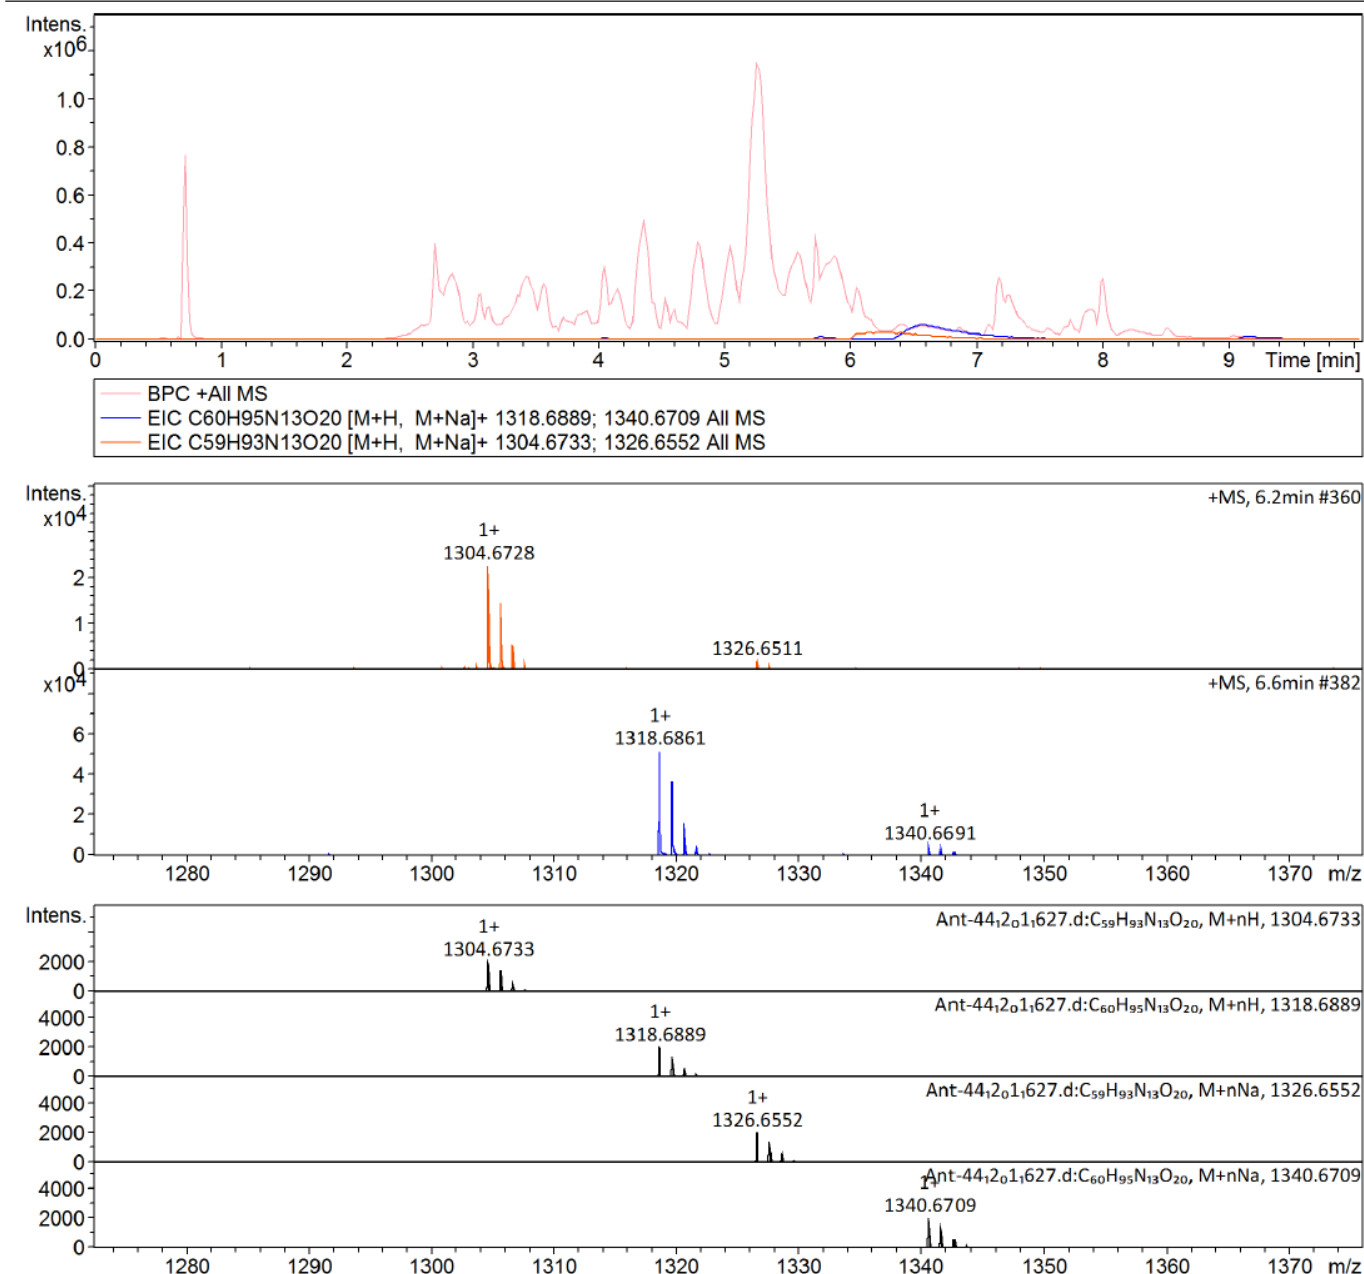

Supplement: MD-009-C8MD00002F-s001.pdf [file MD-009-C8MD00002F-s001.pdf]
